# Supplementary material
Source: publisher site journal article supplement (https://www.dovepress.com/article/343097)
Supplement: Supplementary file 1 [file get_supplementary_file.php]

**Supplementary information**

**The Circadian Gene NPAS2 Act as a Putative Tumor Stimulative Factor for Uterine Corpus Endometrial Carcinoma**

**Supplementary Figures**





S Figure 1. Values of CCCP inhibitory concentration were (IC50) determined by CCK-8 cell proliferation assays in UCEC cells.


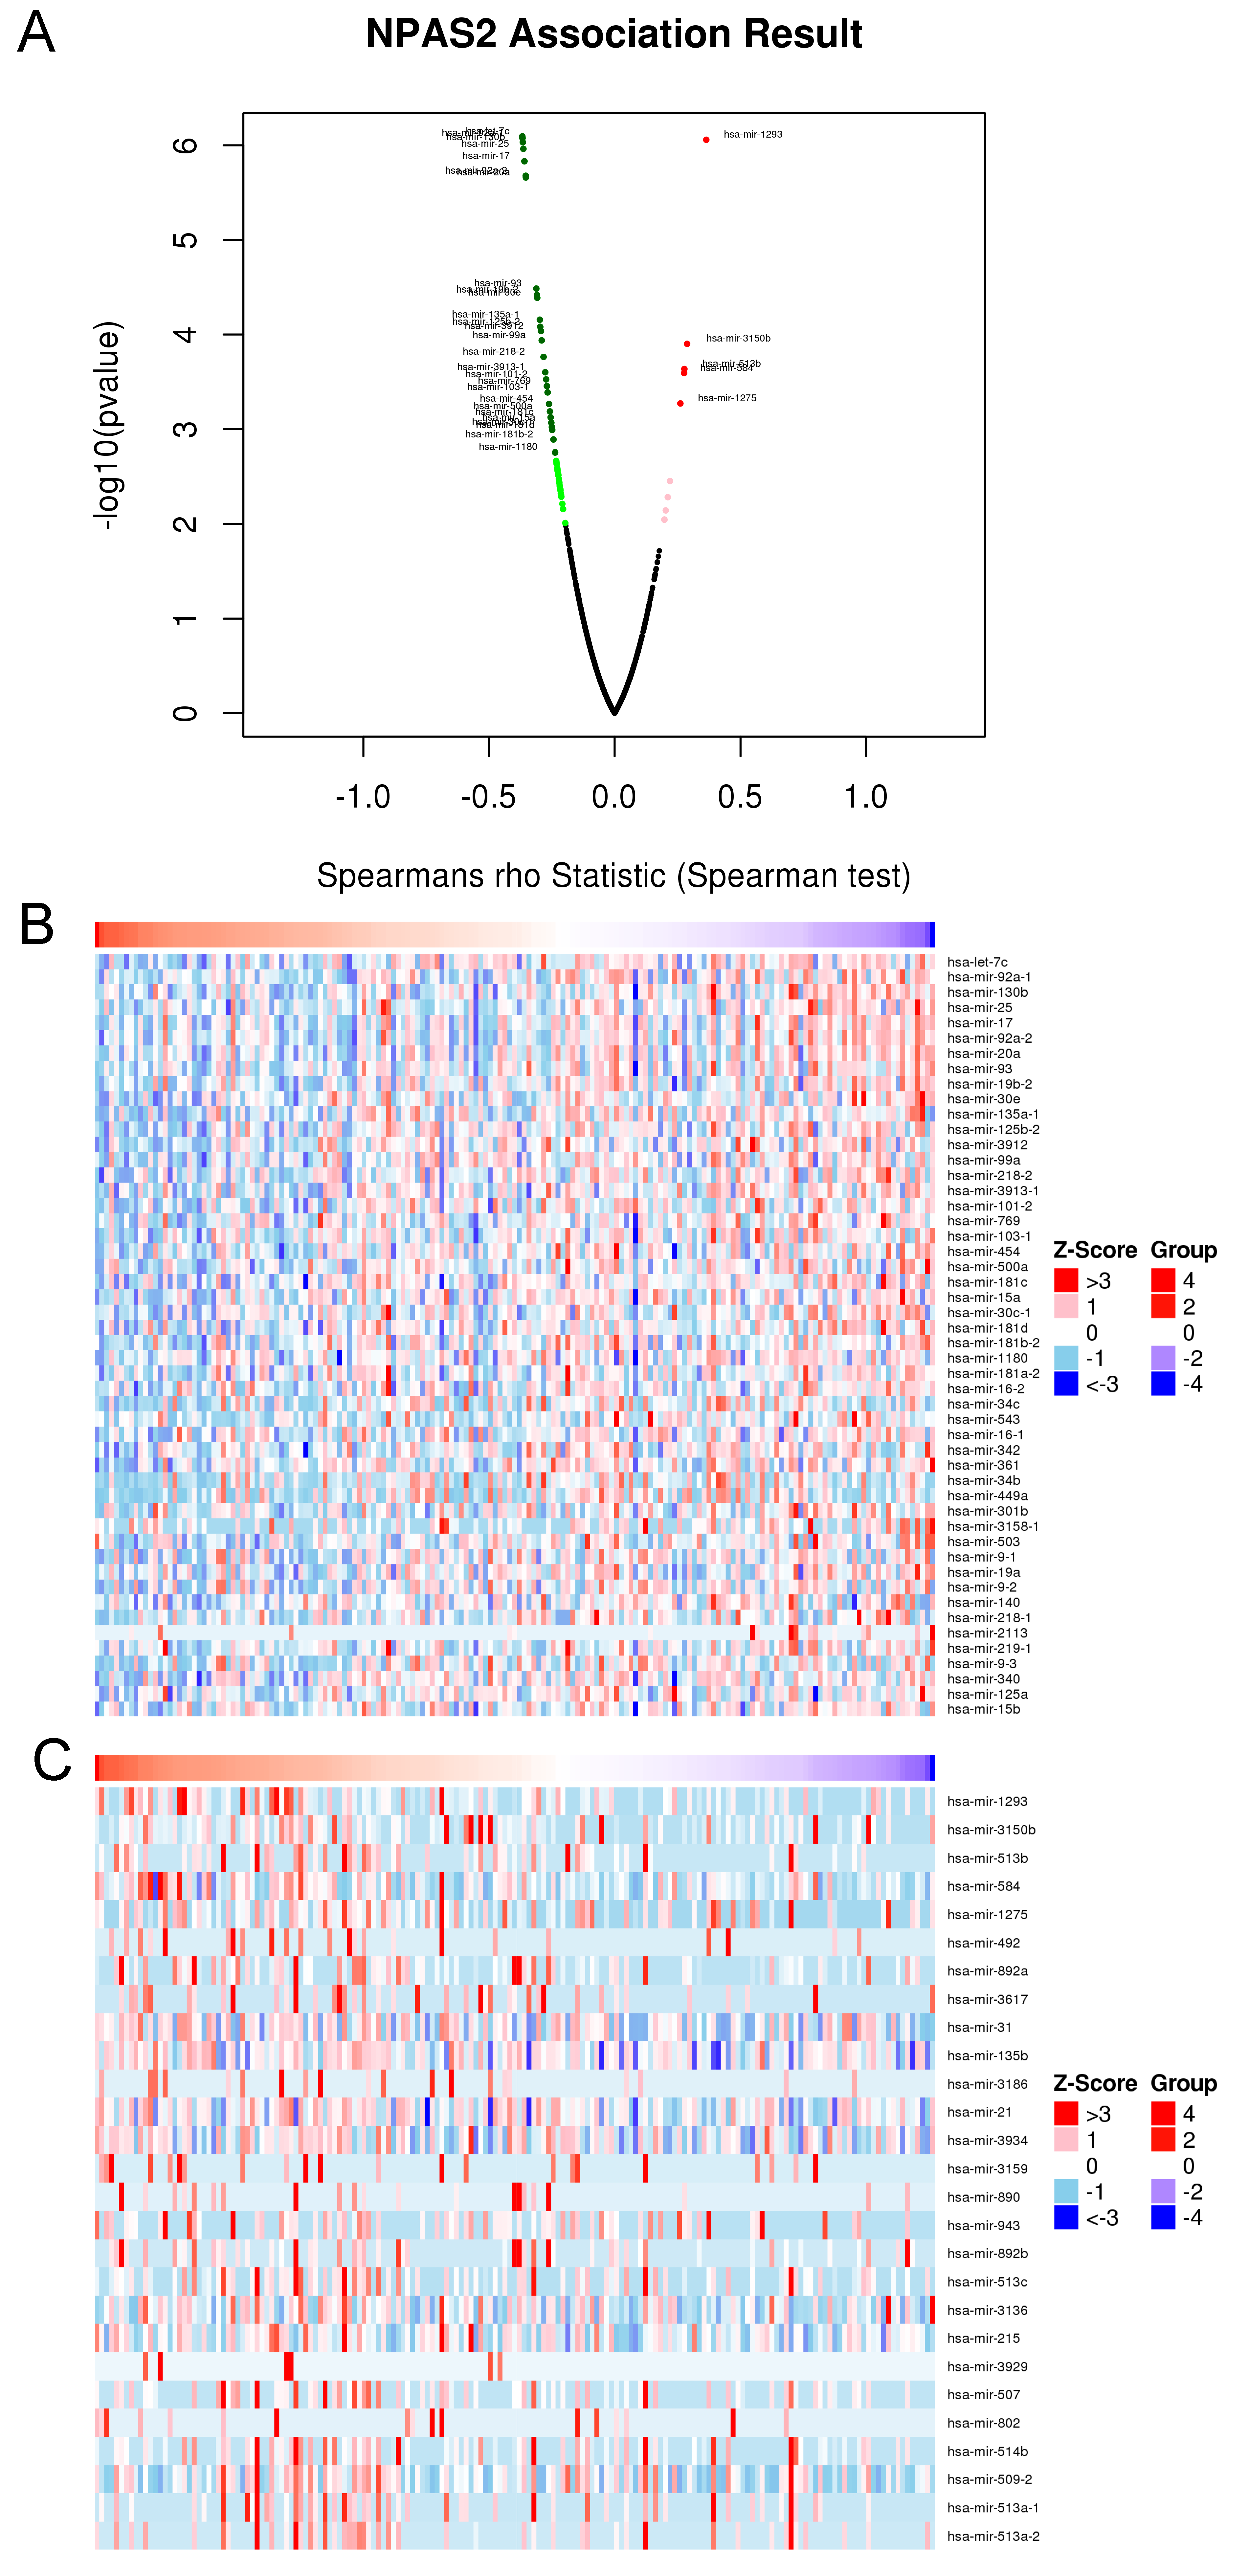


S Figure 2. Identification of potential up or downstream miRNA of NPAS2 in UCEC via linkedOmics.
